# Supplementary material for: M2 macrophages promote myofibroblast differentiation of LR-MSCs and are associated with pulmonary fibrogenesis
Source: PubMed Central journal article supplement (PMC6260991; doi:10.1186/s12964-018-0300-8), 2018-11-23
Supplement: 12964_2018_300_MOESM1_ESM.pdf [file 12964_2018_300_MOESM1_ESM.pdf]

**M2 macrophages promote myofibroblast differentiation of LR-MSCs and are associated with pulmonary fibrogenesis**

Jiwei Hou<sup>1,2</sup>, Jingyan Shi<sup>1,2</sup>, Ling Chen<sup>1,2</sup>, Zhongyang Lv<sup>1,2</sup>, Xiang Chen<sup>1,2</sup>, Honghui Cao<sup>1,2</sup>, Zou Xiang<sup>3</sup>, Xiaodong Han<sup>1,2\*</sup>

<sup>1</sup> Immunology and Reproduction Biology Laboratory & State Key Laboratory of Analytical Chemistry for Life Science, Medical School, Nanjing University, Nanjing, 210093, China.

<sup>2</sup> Jiangsu Key Laboratory of Molecular Medicine, Nanjing University, Nanjing, 210093, China

<sup>3</sup> Department of Health Technology and Informatics, Faculty of Health and Social Sciences, The Hong Kong Polytechnic University, Hung Hom, Kowloon, Hong Kong, China.

**E-mail address:**

Jiwei Hou: houjiwei3707@126.com

Jingyan Shi: 18260098653@163.com

Ling Chen: chenlingcathy@163.com

Zhongyang Lv: zhongyanglv@163.com

Xiang Chen: chenxiang910110@163.com

Honghui Cao: caohonghui92@gmail.com

Zou Xiang: xiang.y.zou@polyu.edu.hk

Mailing address: Immunology and Reproductive Biology Laboratory, Medical College of Nanjing University, Hankou Road 22, Nanjing, 210093, China

**\*Corresponding author:** Xiaodong Han

E-mail address: hanxd@nju.edu.cn

Tel: +86-25-83686497

Fax: +86-25-83686497

**Supplementary Table S1.** Specifications of primary antibodies

| Vendor         | Antibody                  | Catalog no.   | Working dilution       |
|----------------|---------------------------|---------------|------------------------|
| Abcam          | Rat anti-Sca1             | ab51317       | IF, 1:100              |
|                | Rabbit anti-Sca-1         | ab109211      | WB, 1:2,000            |
|                | Rabbit anti-F4/80         | ab100790      | IF, 1:100 IHC, 1:100   |
|                | Rabbit anti-GAPDH         | ab181602      | WB, 1:5,000            |
|                | Rabbit anti-iNOS          | ab15323       | WB, 1:2,000 IHC, 1:100 |
| Proteintech    | Rabbit anti-beta-catenin  | 51067-2-AP    | WB, 1:2,000            |
|                | Mouse anti-CD206          | 60143-1-AP    | WB, 1:2,000 IF, 1:50   |
|                | Rabbit anti-Wnt7a         | 10605-1-AP    | WB, 1:2,000 IF, 1:50   |
|                | Rabbit anti-Histone H3    | 17168-1-AP    | WB, 1:1,000            |
| Santa cruz     | Mouse anti-Frizzled 1     | sc-398082     | IP, 1:40               |
| Boster         | Rabbit anti-Collagen I    | BA0325        | WB, 1:1,000 IF, 1:50   |
|                | Mouse anti- $\alpha$ -SMA | BM0002        | WB, 1:1,000 IF, 1:50   |
| BD Biosciences | PE Rat anti-mouse F4/80   | 565410        | Flow Cyt, 1:100        |
|                | PE Rat anti-mouse CD68    | 566386        | Flow Cyt, 1:100        |
| eBioscience    | PE Rat anti-mouse CCR7    | 85-12-1971-82 | Flow Cyt, 1:100        |
|                | APC Rat anti-mouse CD206  | 85-17-2061-82 | Flow Cyt, 1:100        |

**Supplementary Table S2.** Primers used for real-time PCR.

| Accession Number | Target gene   | Primer sequence (5'-3')   |                         | Size (bp) | Tm (°C) |
|------------------|---------------|---------------------------|-------------------------|-----------|---------|
|                  |               | Forward                   | Reverse                 |           |         |
| NM_007482.3      | Arg-1         | TTTATAGGGTTACGGCCGGTG     | CCTCGAGGCTGTCCTTTTGA    | 146       | 59.5    |
| NM_001355722.1   | F4/80         | TGTCTGAAGATTCTCAAAACATGGA | TGGAGCTTCATAGTTGTAAGGCA | 125       | 58.7    |
| NM_001289726.1   | GAPDH         | CCCTTAAGAGGGATGCTGCC      | TACGGCCAAATCCGTTTACA    | 124       | 60      |
| NM_008361.4      | IL-1 $\beta$  | TGCCACCTTTTGACAGTGATG     | TGATGTGCTGCTGCGAGATT    | 138       | 59.5    |
| NM_001314054.1   | IL-6          | TTCCTCTGGTCTTCTGGAGT      | TGTGACTCCAGCTTATCTCTTGG | 146       | 59      |
| NM_001313921.1   | iNOS          | TCTAGTGAAGCAAAGCCCAACA    | CTCTCCACTGCCCCAGTTTT    | 169       | 60      |
| NM_001278601.1   | TNF- $\alpha$ | CCCTCACACTCACAACCAC       | ACAAGGTACAACCCATCGGC    | 133       | 59      |
| NM_001256224.2   | Wnt5a         | CTCCGGCCCAGAAGCC          | AGAAAAACGTGGCCAAAGCC    | 108       | 59.5    |
| NM_001363757.1   | Wnt7a         | GGAGCTCAAAGTGGGGAGTC      | CCAGGATCTTGCTTCCTTGT    | 138       | 60      |
| NM_001163633.1   | Wnt7b         | TAGGAAGGCCAGTGACCAGA      | ACAATGCTCTGTAAAGATGGCG  | 143       | 59      |
| NM_009290.2      | Wnt8a         | GCCTATCTGACCTACACCGC      | GATGTCTCTCTCGTGGCAGC    | 155       | 60      |
| NM_011720.3      | Wnt8b         | TGACCGGTCCAAAGGCTTAC      | CAACGGTCCCAAGCAAACCTG   | 100       | 60      |
| NM_009518.2      | Wnt10a        | AGATCGCCATCCATGAGTGC      | ACTCTCTCGAAAACCTCGGC    | 122       | 60      |

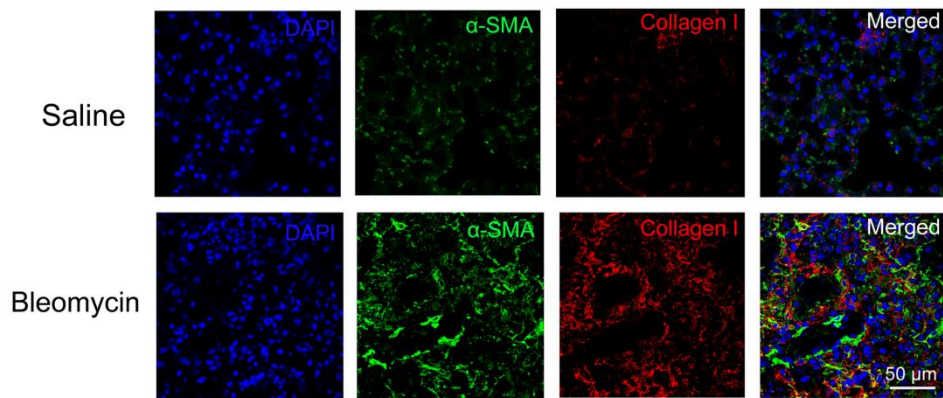

**Supplementary Fig.1 Pulmonary fibrosis is induced in bleomycin-treated mice.**

Mice (n = 10 in each group) received either saline or bleomycin (5 mg/kg body weight) intratracheally. Mice were sacrificed 21 days later. The expression of  $\alpha$ -smooth muscle actin ( $\alpha$ -SMA) and collagen I in lung tissues was measured by immunofluorescence assay.

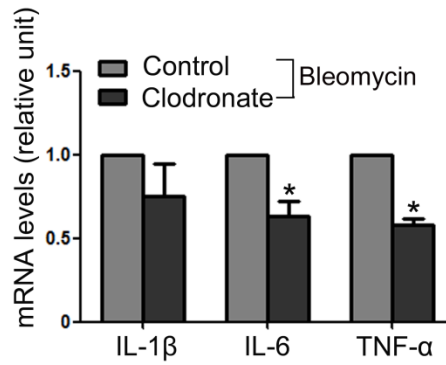

**Supplementary Fig.2 Deletion of macrophages inhibits the expression of inflammatory factors.** A myeloid-specific ablating liposome, clodronate, was injected intratracheally every three days starting two days before the injection of bleomycin, and control mice received injections of a control liposome (n = 10). Expression of IL-1 $\beta$ , IL-6, and TNF- $\alpha$  in lung tissues were measured by q-PCR. Results are expressed as means  $\pm$ SD (n = 5; \*p < 0.05 vs. Control).

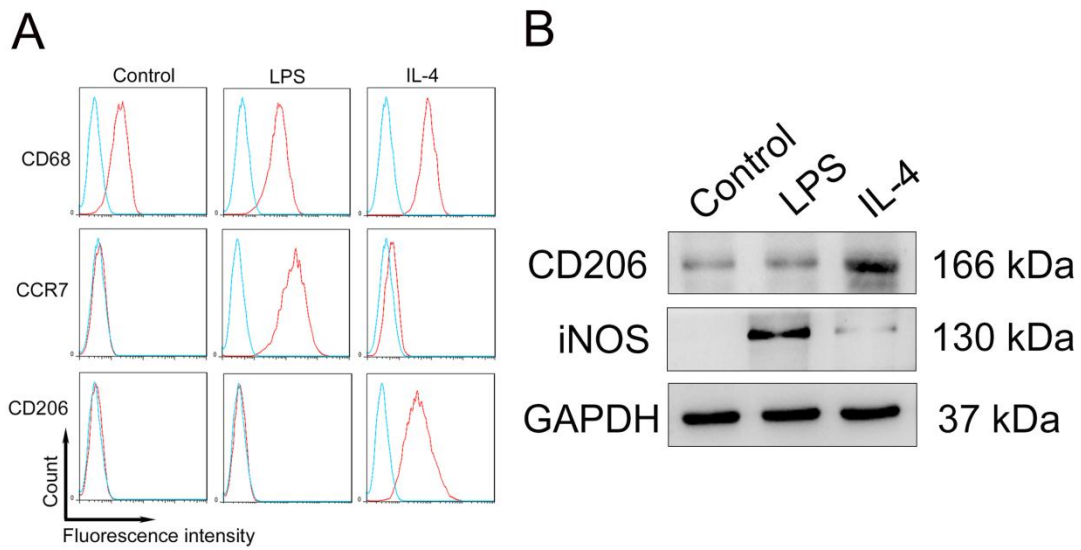

**Supplementary Fig.3** Cytokine-induced macrophage polarization. Mouse macrophages (RAW 264.7) were cultured with lipopolysaccharide (LPS) or IL-4 (10 ng/ml) for 24 h. (A) Validation of M1 and M2 polarization by the flow cytometry. The M0 macrophages were characterized by flow cytometry with CD68 staining. CCR7 and CD206 are specific surface markers of M1 and M2 macrophages, respectively. The isotype control (blue) and indicated surface marker (red) was merged,  $1 \times 10^4$  cells were counted per experiment. (B) Expression of CD206 and iNOS on macrophages was measured by western blotting.

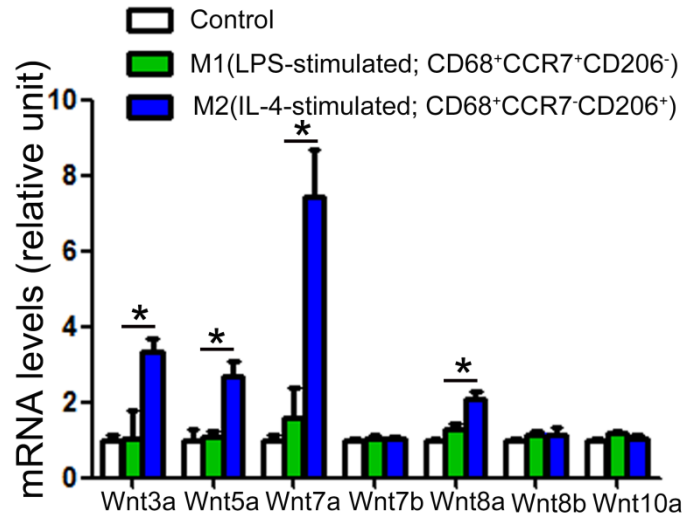

**Supplementary Fig.4 M2 macrophages express significant levels of Wnt7a.** RAW 264.7 cells were treated with LPS (10 ng/ml) or IL-4 (10 ng/ml) for 24 h to induce M1 and M2 macrophage differentiation, respectively. Expression of indicated cytokines in differentiated macrophage subtypes were determined by q-PCR. Results are expressed as means  $\pm$ SD (n = 5; \*p < 0.05 vs. M1 macrophage).

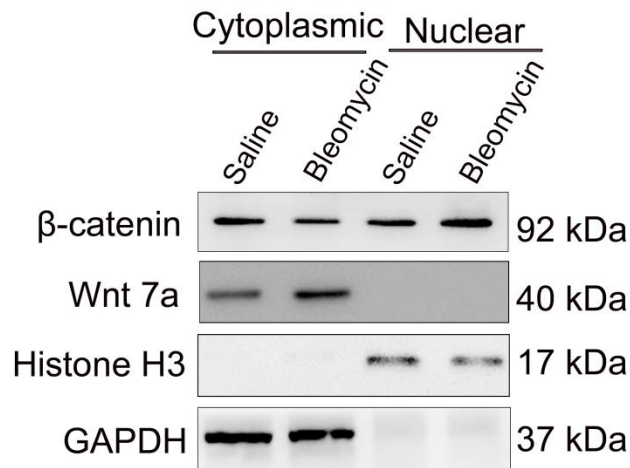

**Supplementary Fig.5 Bleomycin treatment upregulates Wnt7a, and activates Wnt/ $\beta$ -catenin signaling in mouse lung tissues.** The expression of  $\beta$ -catenin and Wnt7a in nuclear and cytoplasmic extracts was analyzed by western blotting. Histone H3 and GAPDH were used as loading controls for nuclear and cytoplasmic proteins, respectively.



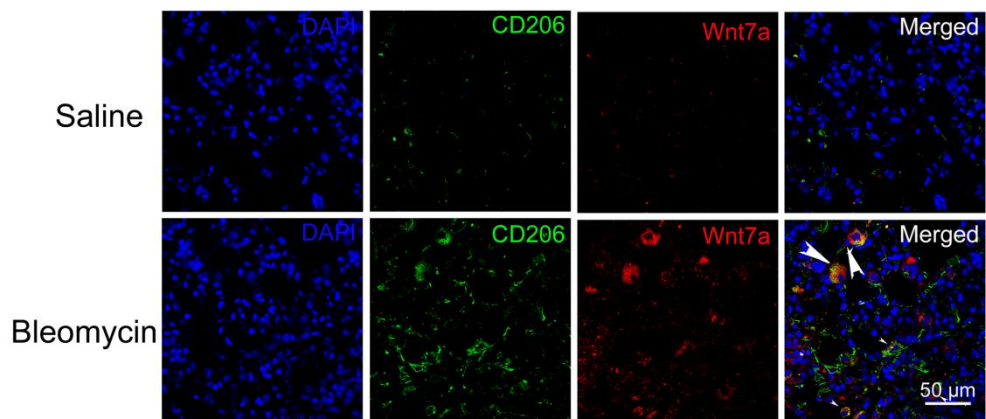

**Supplementary Fig.6** M2 macrophages express Wnt7a in fibrotic lungs of bleomycin-treated mice. Colocalization of Alexa Fluor 488-labeled CD206 (green) and Alexa Fluor 594-labeled Wnt7a (red) was examined by a confocal fluorescence microscope. Arrow indicates individual cells positive for both CD206 (green) and Wnt7a (red).

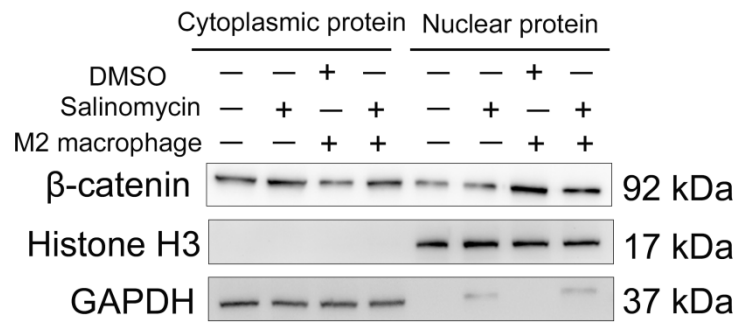

**Supplementary Fig.7** Effects of salinomycin on the nuclear translocation of  $\beta$ -catenin induced by M2 macrophages in LR-MSCs. Cytoplasmic and nuclear extracts were prepared and analyzed by western blotting using  $\beta$ -catenin antibodies. Histone H3 and  $\beta$ -actin were used as loading controls for nuclear and cytoplasmic proteins, respectively.
